# Supplementary material
Source: Springer Nature journal article supplement (https://www.springermedizin.de/resource/supplementary/13063_2013_1466_MOESM3_ESM.pdf/9620072)

# ADAPT Umbrella

# ADAPT HR+/HER2-

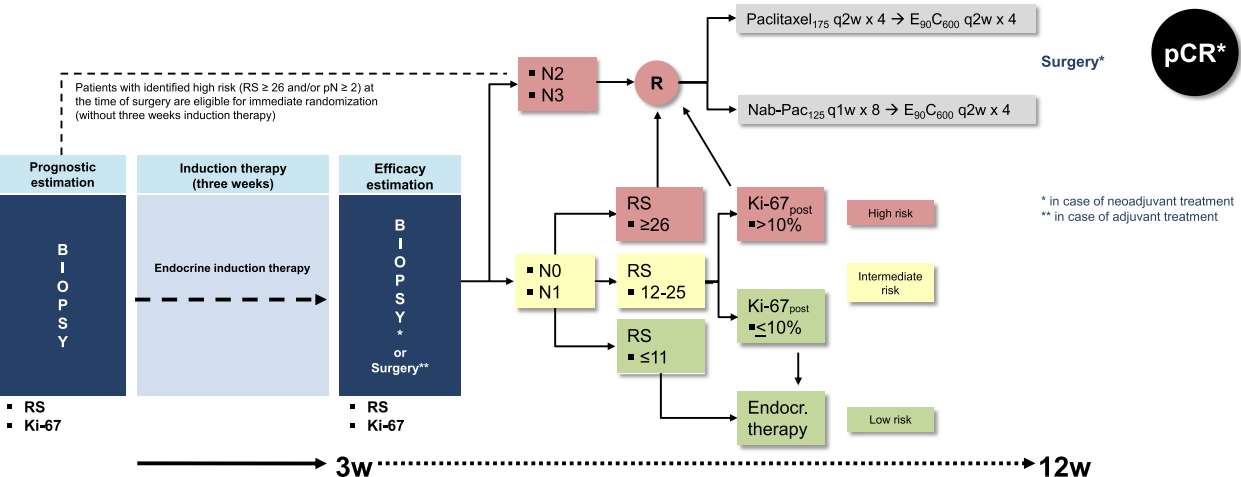

Supplement: MOESM3 [file 9620072]
